# Supplementary material for: Hyperandrogenism in POMCa-deficient zebrafish enhances somatic growth without increasing adiposity
Source: PubMed Central journal article supplement — J Mol Cell Biol. 2019 Jun 25;12(4):291–304. doi: 10.1093/jmcb/mjz053 (PMC7232124; doi:10.1093/jmcb/mjz053), 2019-06-25
Supplement: jmcb-2019-0003_r2_supplementary_material_mjz053.pdf [file jmcb-2019-0003_r2_supplementary_material_mjz053.pdf]

1 **Supplementary Information for**

2 **Hyperandrogenism in POMCa-deficiency zebrafish enhances somatic**  
3 **growth without increasing adiposity**

4 **Running title:** Hyperandrogenism's roles in POMCa deficient zebrafish

5 Chuang Shi<sup>1,2</sup>, Yao Lu<sup>1,2</sup>, Gang Zhai<sup>1</sup>, Jianfei Huang<sup>1,2</sup>, Guohui Shang<sup>1,2</sup>, Qiyong Lou<sup>1</sup>, Dongliang Li<sup>3</sup>,  
6 Xia Jin<sup>1</sup>, Jiangyan He<sup>1</sup>, Zhenyu Du<sup>3</sup>, Jianfang Gui<sup>1</sup> and Zhan Yin<sup>1,4</sup> \*

7

## 8 **Supplementary Materials and methods**

### 9 *Experimental animals*

10 The AB strain of zebrafish adopted in this study were raised and bred at 28.5°C with a 14 hour light  
11 and 10 hour dark cycle. The developmental stages were determined according to days postfertilization  
12 (dpf) or morphological features as described previously (Kimmel et al., 1995). The transgenic fish of  
13 Tg (-1.0:GFP) (CZ31) and Tg (-1.2ins:EGFP) (CZ15) and the *cyp17a1* mutant fish (ihb144)  
14 were obtained from the China zebrafish resource center (CZRC). The procedures of this research were  
15 approved by the Animal Research and Ethics Committee of the Institute of Hydrobiology of the  
16 Chinese Academy of Sciences (Approval ID: IHB 2013724).

### 17 *Generation of pomca mutant lines via TALENs.*

18 The sequence-specific TALENs effector pairs targeting the zebrafish *pomca* gene (NC\_007128.6,  
19 NCBI) were designed according to a previous report (Cermak et al., 2011) and assembled using the  
20 Golden Gate TALEN kit (Addgene, 1000000024). For depletion of all of peptides derived from the  
21 POMCA preprotein, left arms and right arms of TALENs were designed in the region of exon 2 of  
22 *pomca*. Two independent *pomca* mutant 1 lines (M1L1 and M1L2) were screened by genotyping by  
23 enzyme digested with Eco31I (Fermentas) and DNA sequencing. Most of the M1 zebrafish assays were  
24 performed with the zebrafish of the M1L1 zebrafish unless specifically indicated. To obtain the mutant  
25 lines with disrupted functional  $\alpha$ -MSH and ACTH only, a 3-aa deletion *pomca* mutant line 2 (M2) was  
26 generated. To obtain the mutant lines that were missing only  $\beta$ -MSH and  $\beta$ -END, two independent  
27 *pomca* mutant 3 lines (M3L1 and M3L2) were generated. The detailed information for TALENs is  
28 shown in Figure 5A and 5B. The PCR primers for genotyping are listed in Table S1. To avoid the  
29 sexual differences in metabolism, male fish were chosen in this study unless specifically indicated.

### 30 *Whole-mount in situ hybridization (WISH)*

31 WISH was carried out as described previously (Thisse and Thisse, 2008). The cDNA of zebrafish  
32 *pomca* and *hsd3b1* were amplified by RT-PCR with total RNA from 6 dpf larvae zebrafish. Primers  
33 were designed based on the sequences in GenBank for *pomca* and *hsd3b1* and are described in Figure  
34 S1.

### 35 *Immunofluorescence and western blot*

36 Adult zebrafish pituitaries glands were fixed in 4% paraformaldehyde (PFA) in phosphate-buffered  
37 saline (PBS) and incubated overnight at 4°C. The immunofluorescence labeling protocol was carried  
38 out as described previously (Jaffe et al., 2010). The primary antibody of sheep anti- $\alpha$ -MSH (Millipore,  
39 AB5087) was diluted 1:10000, and the secondary antibody of donkey anti-sheep conjugated with  
40 DyLight 594 (ImmunoReagents, IMR-DkxSh-003-D594NHSX) was diluted 1:200.

41 For western blotting, SDS-PAGE was performed as previously described (Lou et al., 2012). The  
42 protein samples were collected from the skeletal muscle tissue of adult zebrafish. The primary  
43 antibodies of anti-GAPDH (Proteintech Group, 0004-1-Ig), anti-Akt (Cell Signaling Technology,  
44 9272s), anti-phospho-Akt (S473) (Cell Signaling Technology, 4060s) and anti-phospho-s6 ribosomal  
45 protein (S240/244) (Cell Signaling Technology, 2215s) were diluted 1:1000 in Can Get Signal Solution  
46 for primary antibody dilution (Toyobo, NKB-101). The signal was detected by a CCD camera-based  
47 imager (ImageQuant LAS 4000 mini, GE). The intensity of the bands was quantitated using ImageJ  
48 version 1.49V software.

#### 49 *Food intake and oxygen consumption measurement*

50 The food intake protocol for larval fish was carried out as described previously (Shimada et al., 2012).  
51 Larval fish were fed with 4-Di-10-ASP-labeled (Invitrogen, D291) paramecia in darkness at 6 dpf.  
52 Fluorescence-integrated intensity was measured using ImageJ 1.49 V software. For adult fish food  
53 intake, fish were selected randomly from the *pomca* mutant and control fish. The fish were placed  
54 individually in 1-L tanks and starved for four days. Each fish was weighed, and an excess of newly  
55 hatched brine shrimp were added to the tank. After 2 hours of feeding, the fish was weighed again. The  
56 oxygen consumption measurements were performed as we previously described (Li et al., 2014).  
57 Briefly, 3 adult fish were transferred to separate respiration chambers with 1000 ml of fresh water at  
58 28°C and then starved for 5 days. The oxygen concentrations within the chamber were measured using  
59 a SevenGo pro-SG6 oximeter (Mettler-Toledo AG; Analytical; CH-8603) after 6 hours of chamber  
60 enclosure. The oxygen concentration in a respiration chamber without any fish during the same period  
61 was treated as the initial oxygen concentration. The oxygen consumption was calculated as milligrams  
62 O<sub>2</sub>/h/g body weight.

#### 63 *Zebrafish behavioral assay*

64 The dark-light emergence test is a relatively simple and suitable behavioral assay for juvenile zebrafish.  
65 Locomotor activity was monitored using a ZebraBox system (ViewPoint Life Sciences, Inc., Montreal,

66 Canada), following previously described methods (Peng et al., 2016). Swimming behavior was  
67 monitored in response to dark-to-light transitions using larvae at 4 dpf. Since the HPI axis is under  
68 circadian regulation, the behavioral assay was restricted to the afternoon (15:30). The light-driving  
69 procedure was in accordance with a normal light/dark cycle from 15:30 to the next day at 8:00,  
70 followed by a 10 min light/10 min dark cycle (repeated 6 times) and terminated with 2 hours of light.  
71 The data were collected every 20 s. Locomotor behavior was monitored in 96-well flat-bottom plates,  
72 and 48 larval were selected randomly from the *pomca* mutant and control fish.

73 For the adult zebrafish behavioral assay, each fish at the 150 dpf stage was placed into a 25×15 cm tank.  
74 The locomotor trajectory was monitored using a ZebraTower system (ViewPoint Life Sciences).  
75 Movements were recorded every 10 s over 10 min.

#### 76 *Dark-induced melanosome dispersal assay*

77 A dark-induced melanosome dispersal assay of larval zebrafish was carried out following a previous  
78 description (Wagle et al., 2011). Briefly, Petri dishes containing 4 dpf larval zebrafish were transferred  
79 to an enclosed compartment for 30 min at night. After dark treatment, larval zebrafish were  
80 anesthetized with cold water and fixed with 4% PFA/PBS. Images were obtained by an Olympus  
81 SZX16 FL stereomicroscope. The melanocyte-covered areas and numbers were measured using ImageJ  
82 1.49 version software.

#### 83 *Overfeeding assay and body composition measurement*

84 Different genotypic male zebrafish at the 120 dpf stage were randomly divided into two tanks for  
85 normal feeding and overfeeding. The normal feeding protocol was three meals of newly hatched brine  
86 shrimp in circulatory water system. For overfeeding, the zebrafish were fed with excess brine shrimp  
87 six times a day from approximately 8:30 AM until approximately 9:30 PM. The overfeeding assay  
88 lasted for 15 days. Total lipid contents in whole zebrafish were extracted following homogenization in  
89 chloroform/methanol (2:1, v/v) according to the Folch method (Folch et al., 1957).

#### 90 *Drug treatment*

91 The mTORC1 inhibitors rapamycin and AZD8055 were purchased from Selleck Chemicals and  
92 dissolved in DMSO (Sigma). M1 fish and control fish were pooled into 3 tanks and treated with DMSO,  
93 rapamycin or AZD8055 respectively for 15 days. Each concentration of rapamycin and AZD8055 was  
94 5 μM.

#### 95 *qRT-PCR analysis*

96 Total RNA was extracted using the TRIzol<sup>TM</sup> Reagent (Thermo Fisher, 15596026). Complementary  
97 DNA was synthesized using the HiScript II Q Select RT SuperMix (Vazyme, R233-01). qRT-PCR  
98 analysis was performed using the SYBR Green Real-time PCR Master Mix (Toyobo, QPK-201) in a  
99 real-time detection system (Bio-Rad). The actb1 gene was used as the reference gene. The primers used  
100 are listed in Table S1.

101

## 102 **References**

- 103 Cermak, T., Doyle, E.L., Christian, M., et al. (2011). Efficient design and assembly of custom TALEN  
104 and other TAL effector-based constructs for DNA targeting. *Nucleic acids research* 39, e82-e82.
- 105 Folch, J., Lees, M., and Sloane-Stanley, G. (1957). A simple method for the isolation and purification  
106 of total lipids from animal tissues. *J biol Chem* 226, 497-509.
- 107 Jaffe, K.M., Thiberge, S.Y., Bisher, M.E., et al. (2010). Imaging cilia in zebrafish. *Methods in cell*  
108 *biology* 97, 415-435.
- 109 Kimmel, C.B., Ballard, W.W., Kimmel, S.R., et al. (1995). Stages of embryonic development of the  
110 zebrafish. *Developmental dynamics* 203, 253-310.
- 111 Li, D., Lou, Q., Zhai, G., et al. (2014). Hyperplasia and cellularity changes in IGF-1-overexpressing  
112 skeletal muscle of crucian carp. *Endocrinology* 155, 2199-2212.
- 113 Lou, Q., He, J., Hu, L., et al. (2012). Role of *lhx2* in the noncanonical Wnt signaling pathway for  
114 convergence and extension movements and hypaxial myogenesis in zebrafish. *Biochimica et*  
115 *Biophysica Acta (BBA)-Molecular Cell Research* 1823, 1024-1032.
- 116 Peng, X., Lin, J., Zhu, Y., et al. (2016). Anxiety-related behavioral responses of  
117 pentylentetrazole-treated zebrafish larvae to light-dark transitions. *Pharmacology Biochemistry and*  
118 *Behavior* 145, 55-65.
- 119 Shimada, Y., Hirano, M., Nishimura, Y., et al. (2012). A high-throughput fluorescence-based assay  
120 system for appetite-regulating gene and drug screening. *PLoS One* 7, e52549.
- 121 Thisse, C., and Thisse, B. (2008). High-resolution in situ hybridization to whole-mount zebrafish  
122 embryos. *Nature protocols* 3, 59-69.
- 123 Wagle, M., Mathur, P., and Guo, S. (2011). Corticotropin-releasing factor critical for zebrafish  
124 camouflage behavior is regulated by light and sensitive to ethanol. *The Journal of Neuroscience* 31,  
125 214-224.

126

**Supplementary Table 1. Primers used in this study.**

| Test                               | Symbol          | NCBI accession No.  | Forward primers (5'-3') | Reverse primers (5'-3') | product length(bp) |
|------------------------------------|-----------------|---------------------|-------------------------|-------------------------|--------------------|
| <b>Genotyping for <i>pomca</i></b> | M1              | 353221              | ACTATTGGGTTATTTGATTC    | CTAATTTTCTAATGGGAGTT    | 481                |
|                                    | M2 and M3       |                     | GGAATGCATACAATTATGC     | GCATGATAAGAACCTCTC      | 622                |
| <b>WISH</b>                        | <i>pomca</i>    | NM_181438.3         | GCAGGTCTGAACCTTACAGAT   | CCCACCTTCGTTTCTATGCA    | 622                |
|                                    | <i>hsd3b1</i>   | XM_689112.7         | GCAACAAAGCTGCTGCTTGA    | GCCTCTCTTGATCCCAAAGC    | 544                |
| <b>qRT-PCR</b>                     | <i>lepa</i>     | NM_001128576.1      | CGCTGACAAACCCATCCAAG    | CTTCAGTGTGCAGTCCATGC    | 157                |
|                                    | <i>insa</i>     | NM_131056.1         | GGTCGTGTCCAGTGTAAAGCA   | GGAAGGAAACCCAGAAGGGG    | 147                |
|                                    | <i>gcga</i>     | NM_001271770.1      | CACAAGACTTCGTTCAAGTGGC  | AGGTATGAGCTCACGTGCGC    | 100                |
|                                    | <i>pomca</i>    | NM_181438.3         | TCTTGGCTCTGGCTGTTC      | TCGGAGGGAGGCTGTAG       | 184                |
|                                    | <i>gh1</i>      | NM_001020492.2      | GCATCAGCGTGCTCATCAAG    | TGAGACTGGTCTCCCTACG     | 114                |
|                                    | <i>fshb</i>     | NM_205624.1         | AGAGCGAAGAATGTGGGAGC    | GAATCAACCCCTGCAGGACA    | 178                |
|                                    | <i>lhb</i>      | NM_205622.2         | AGCTTGGTTTTTCCACGCTG    | TACGTGCACACTGTCTGGTG    | 170                |
|                                    | <i>tshb</i>     | NM_181494.2         | AGGTTGCCGTGCCTATGTG     | GGACCCACCAACTCCTTTATGT  | 145                |
|                                    | <i>prl</i>      | NM_181437.3         | CTCAGCACCTCACTACCAAT    | CAGAGACCGAGCCAATGACA    | 168                |
|                                    | <i>cyp11a1</i>  | NM_152953.2         | CAGTGTCTTGCCTTACCA      | TGATGGCCCTCAGCTTTGAA    | 171                |
|                                    | <i>Cyp17a1</i>  | NM_212806.3         | CTCTTTGACCCAGGACGCTT    | TTTGCAAATCCACGCCAGG     | 154                |
|                                    | <i>Cyp19a1a</i> | NM_131154.3         | GACTGGCTGCACAAAAGCA     | CAAGTTTCTCTGCGTGTGCC    | 106                |
|                                    | <i>hsd17b3</i>  | NM_200364.1         | ACGGCTGAGGAGTTTGTGAG    | GTTTCACTCTGCAGGACCCA    | 131                |
|                                    | <i>cyp11c1</i>  | NM_001080204.1      | CCTGATGTGCAGGAGTGTGT    | TGAACGGTGATTCCACAGG     | 149                |
|                                    | <i>cyp21a1</i>  | XM_021466882.1      | CTTTTTGGAAGGTGGTGGCG    | GTTCAAGGAGTGGCTTTCT     | 170                |
|                                    | <i>hsd3b1</i>   | XM_689112.7         | TTGATGATTGCCGGGAGAG     | TTCACTGATTCAACTGCTCCA   | 149                |
|                                    | <i>actb1</i>    | NM_131031.1         | ACTCAGGATGCGGAAACTGG    | AGGGCAAAGTGGTAAACGCT    | 118                |
|                                    | <i>lgf1a</i>    | NM_131825.2         | GGCGCCTCGAGATGTATTGT    | TGTTTCTCGGCTCGAGTTC     | 165                |
|                                    | <i>lgf1b</i>    | NM_001115050.1      | GCGGTGGTCTCGCTCTCG      | TCTGCTAACTTCTGGTATCG    | 190                |
|                                    | <i>socs1a</i>   | NM_001003467.1      | CTGTGGAGGAAGCACACCTG    | ACGGGACCGTTTTGTGCTTT    | 118                |
| <i>socs2</i>                       | NM_001114550.1  | ACTCCACGGAAGCATCGAG | TCCTTGGCTTCATTGGCTGT    | 148                     |                    |

129 **Supplementary Figures and Legend**

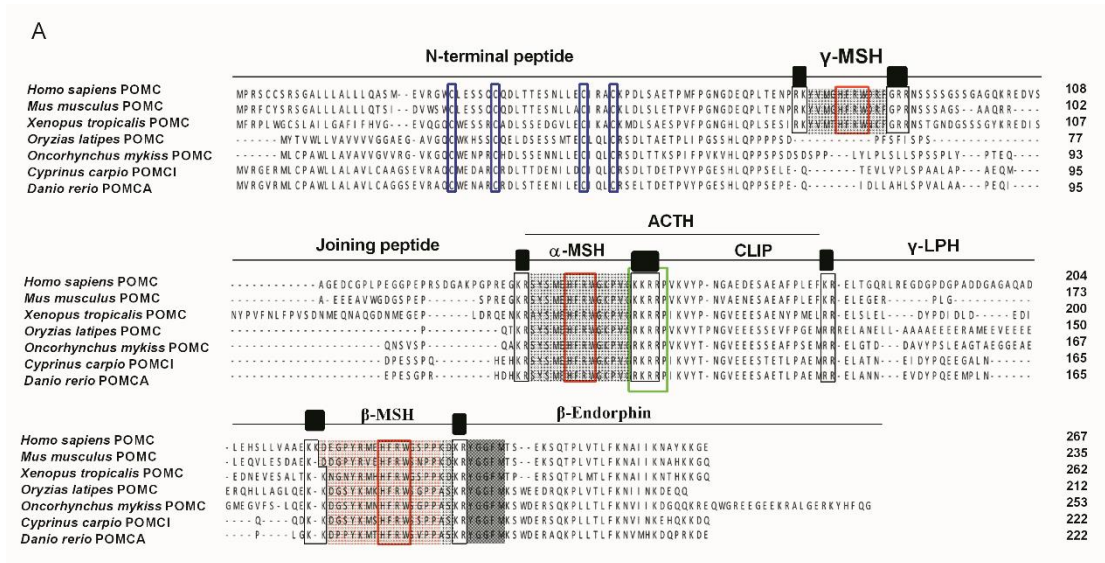

130  
 131 **Figure S1. Multiple sequence alignment of POMC.** (A) Alignment of the POMC sequences from  
 132 human (*Homo sapiens*, NP\_001306133.1), mice (*Mus musculus*, NP\_001265512.1), Western clawed  
 133 frogs (*Xenopus tropicalis*, NP\_001011318.1), rainbow trout (*Oncorhynchus mykiss*, NP\_001118190.1),  
 134 medaka (*Oryzias latipes*, XP\_004066504), carp (*Cyprinus carpio*, CAA74968.1) and zebrafish (*Danio*  
 135 *rerio*, NP\_852103.1). The blue boxes indicate conserved cysteine residues in all POMC sequences.  
 136 Light and dark gray boxes show MSH peptides and endorphin core, respectively. The black boxes  
 137 represent endoproteolytic cleavage sites of POMC. The red boxes and green boxes show the fully  
 138 conserved HFRW motif and K/RKRRP motif in all selected species.  
 139



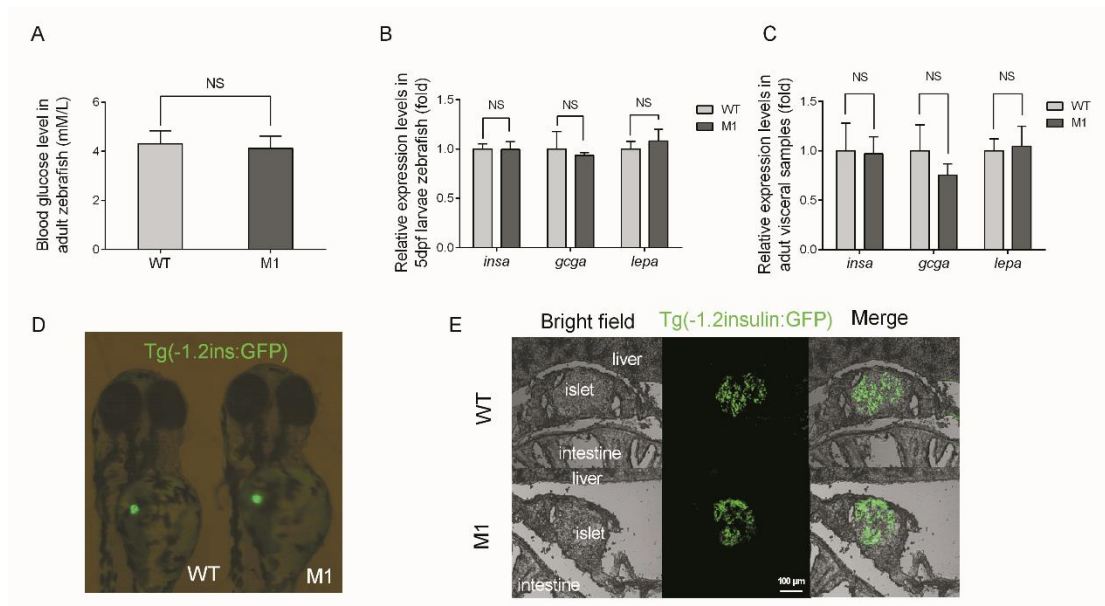

140

141 **Figure S2. Features of major signaling involved in glucose homeostasis in *pomca*-deficient**

142 **zebrafish.** (A) The blood glucose levels of *pomca* M1 fish and WT control siblings 30 minutes after

143 feeding at adult stage (n=9/group). (B and C) Relative expression level of *insa*, *gcga* and *lepa* in larval

144 zebrafish at 4 dpf (B) and visceral tissue at the adult stage (C) (n=3/group). (D and E) GFP (insulin:

145 GFP) expression pattern in the islet at 4dpf (D) and the adult stage (E) of *pomca* M1 fish and WT

146 control siblings. Data are presented as the means  $\pm$  SD from independent student's t-test. 'NS' indicates

147 that there're no significant differences between two groups.

148

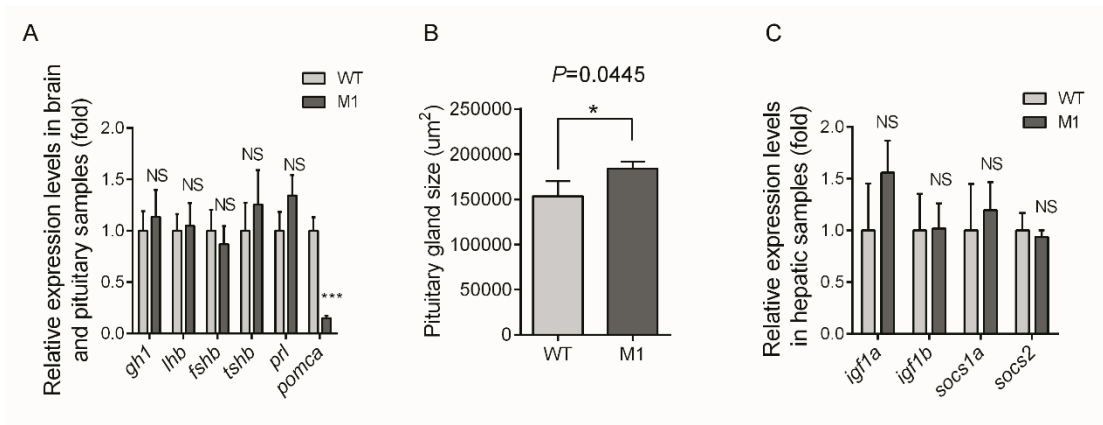

149

150 **Figure S3. Expression of major pituitary hormones and key factors involved in GH signaling. (A)**

151 Relative expression of pituitary gland hormone genes, *gh1*, *lhb*, *fshb*, *tshb*, *prl* and *pomca* in brain and

152 pituitary gland tissue (n=3/group). **(B)** Pituitary gland size was measured with image J software

153 (N=3/group). **(C)** Relative expression of *igf1a*, *igf1b*, *socs1a* and *socs2* in hepatic tissue (n=3/group).

154 Data are presented as the means  $\pm$  SD from independent student's *t*-test. \*\*\**P* < 0.001; 'NS' indicates

155 that there're no significant differences between two groups.

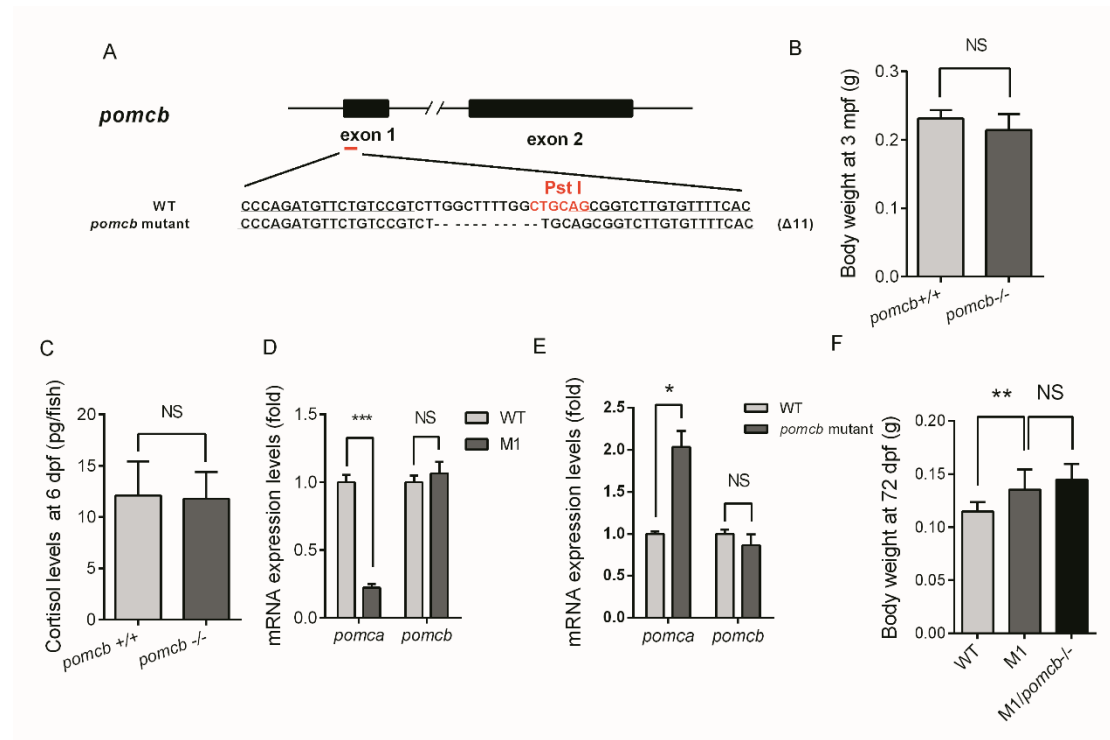

156

157 **Figure S4. The HPI axis was intact in *pomcb* mutant fish and *pomcb* had no redundant roles in**

158 **M1 zebrafish. (A) The schematic represents engineered TALENs in *pomcb*. The restriction enzyme**

159 **PstI was used to identify the genotypes. The underlined fonts indicate the sequences of the two**

160 **targeting arms of TALENs. (B) The body weights of *pomcb* mutant fish and wild-type control fish at 3**

161 **mpf. (n=10-12/group). (C) Whole-fish cortisol content in *pomcb* mutant fish and wild-type control fish**

162 **at 6 dpf. (n=10/group). (D) The relative expression levels of *pomca* and *pomcb* mRNA in M1 zebrafish**

163 **and WT zebrafish at 12 dpf (n=3/group). (E) The relative expression levels of *pomca* and *pomcb***

164 **mRNA in *pomcb* mutant zebrafish and WT zebrafish at 12 dpf (n=3/group). (F) *pomca/pomcb* double**

165 **mutant fish and *pomca* M1 zebrafish body weights at 72dpf (n=5-8/group).Data are presented as the**

166 **means  $\pm$  SD. 'NS' indicates that there're no significant differences between two groups.**

167

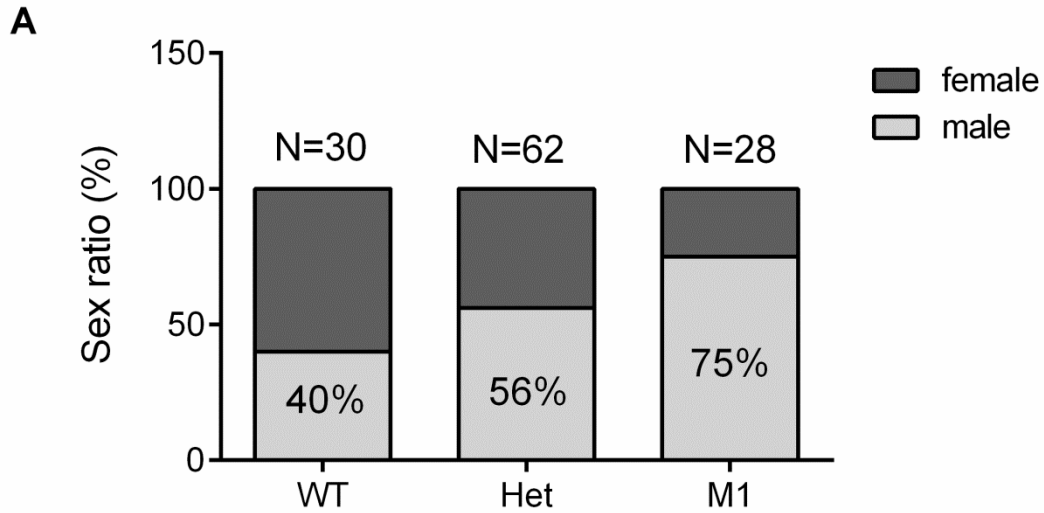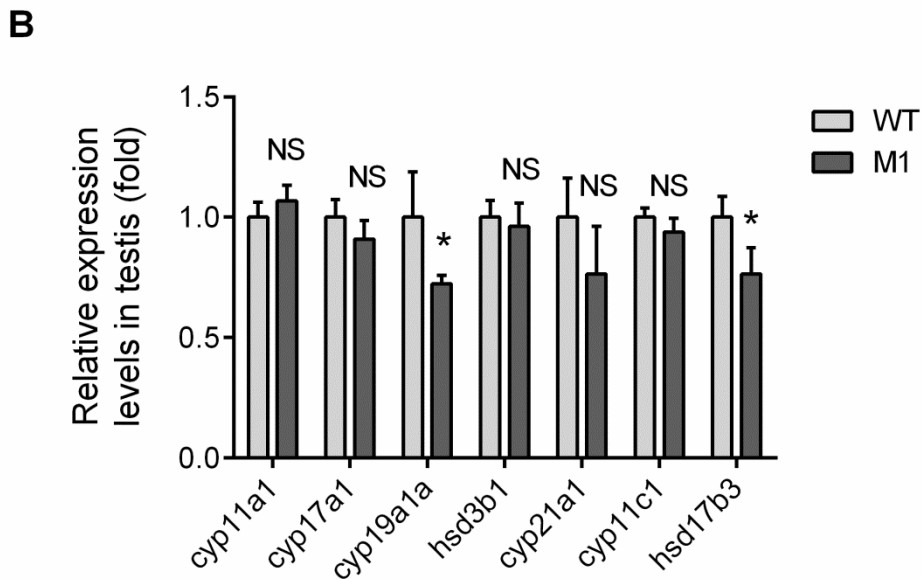

168

169 **Figure S5.** Sex ratios and the expression levels of the relevant genes in the testis. (A) Sex ratios of

170 *pomca* M1 fish, heterozygotes and their wild-type siblings at 6 mpf. (B) The transcriptional levels of

171 key molecules, *cyp11a1*, *cyp17a1*, *cyp19a1a*, *hsd3b1*, *cyp21a1a*, *cyp11c1* and *hsd17b3*, involved in the

172 cortisol and testosterone synthesis in the testis (n=3/group). Data are presented as the means  $\pm$  SD from

173 independent student's t-test. \*P < 0.05; 'NS' indicates that there're no significant differences between

174 two groups.

175

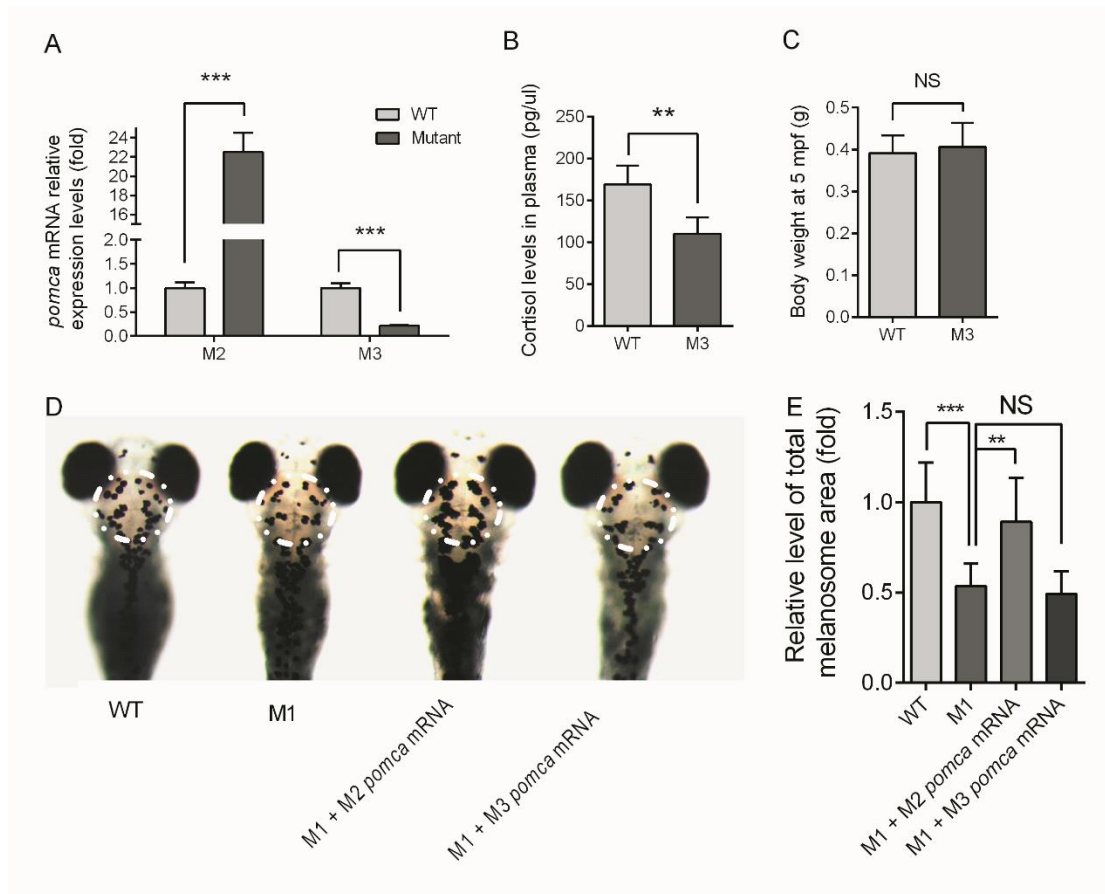

176

177 **Figure S6.** Phenotypes observed in M3 zebrafish. **(A)** Relative expression levels of *pomca* mRNA in  
 178 M2 and M3 brain and pituitary gland tissue at 5 mpf (n=4/group). **(B)** Plasma cortisol levels in WT and  
 179 M3 zebrafish at 5mpf (n=4/group). **(C)** Body weight of WT and M3 zebrafish at 5 mpf  
 180 (n=15-18/group). **(D)** Image of 4 dpf zebrafish exposed in dark 30 min. **(E)** Relative levels of indicated  
 181 melanosome areas in WT (n=8), M1 (n=8) and M1 injected with M2 (n=5) or M3 *pomca* mRNA (n=8)  
 182 zebrafish. Data are presented as the means  $\pm$  SD. 'NS' indicates that there're no significant differences  
 183 between two groups.

184
